# Supplementary material for: Absorption and Intestinal Metabolic Profile of Oleocanthal in Rats
Source: PubMed Central journal article supplement (PMC7076358; doi:10.3390/pharmaceutics12020134), 2020-02-05
Supplement: pharmaceutics-12-00134-s001.pdf [file pharmaceutics-12-00134-s001.pdf]

# Supplementary Materials: Absorption and Intestinal Metabolic Profile of Oleocanthal in Rats

Anallely López-Yerena, Anna Vallverdú-Queralt, Raf Mols, Patrick Augustijns, Rosa M. Lamuela-Raventós and Elvira Escribano-Ferrer

**Table S1.** The declustering potential (DP), focusing potential (FP), collision energy (CE) and entrance potential (EP) settings for the oleocanthal and metabolites.

| Compound                              | RT (min) | MS/MS       | DP (V) | FP (V) | CE (v) | EP (v) | LOQ (µg/mL) | LOD (µg/mL) |
|---------------------------------------|----------|-------------|--------|--------|--------|--------|-------------|-------------|
| OLC                                   | 5.8      | 303–285/179 | –40    | –170   | –10    | –5     | 0.27        | 0.08        |
| OLC-hydroxylated                      | 6.4      | 319–153/183 | –30    | –170   | –30    | –5     | 0.20        | 0.06        |
| OLC-hydrated                          | 6.3      | 321–201/183 | –40    | –170   | –10    | –5     | -           | -           |
| OLC-hydrogenated<br>+ glucuronidation | 5.8      | 481–217/185 | –40    | –170   | –10    | –5     | -           | -           |
| OLC-hydrated<br>+ glucuronidation     | 5.7      | 497–321/201 | –40    | –170   | –10    | –5     | -           | -           |

RT—retention time; LOD—limit of detection; LOQ—limit of quantification. <sup>a</sup> Identified with standard.
